# Supplementary material for: Regulation of GABAA and 5-HT Receptors Involved in Anxiolytic Mechanisms of Jujube Seed: A System Biology Study Assisted by UPLC-Q-TOF/MS and RT-qPCR Method
Source: Front Pharmacol. 2020 Oct 15;11:01320. doi: 10.3389/fphar.2020.01320 (PMC7593408; doi:10.3389/fphar.2020.01320)
Supplement: Supplementary Table 1 — Acquired targets for identified phytochemicals in SZJ extract. [file Table_1.xlsx]

## Sheet: Phytochemical-Targets
No	Phytochemical	Targets Acquisition
S1	3S-N-glc-3-hydroxy-indoleacetic acid	No acceptable target was found for this phytochemical
S2	Pseudolaroside B	TREM1
S2	Pseudolaroside B	CDK2
S2	Pseudolaroside B	PYGL
S2	Pseudolaroside B	Amy1a
S2	Pseudolaroside B	NUDT9
S2	Pseudolaroside B	MTAP
S2	Pseudolaroside B	CA1
S2	Pseudolaroside B	FCAR
S2	Pseudolaroside B	BMP7
S2	Pseudolaroside B	CA12
S2	Pseudolaroside B	TGFBR2
S2	Pseudolaroside B	PGR
S2	Pseudolaroside B	ANG
S2	Pseudolaroside B	CA2
S2	Pseudolaroside B	RTN4R
S2	Pseudolaroside B	EGFR
S2	Pseudolaroside B	IMPA1
S2	Pseudolaroside B	GBA
S2	Pseudolaroside B	DDX6
S2	Pseudolaroside B	BCHE
S2	Pseudolaroside B	PDE4B
S2	Pseudolaroside B	GSTP1
S2	Pseudolaroside B	PIM1
S2	Pseudolaroside B	CHEK1
S2	Pseudolaroside B	PNP
S3/S4	(isomer) N-glc-indoleaceticacid	No acceptable target was found for this phytochemical
S5/S8	(epi)catechin	ACTB
S5/S8	(epi)catechin	AHR
S5/S8	(epi)catechin	AKT1
S5/S8	(epi)catechin	ATP5A1
S5/S8	(epi)catechin	ATP5B
S5/S8	(epi)catechin	ATP5C1
S5/S8	(epi)catechin	CBR1
S5/S8	(epi)catechin	CDK6
S5/S8	(epi)catechin	CEBPB
S5/S8	(epi)catechin	COMT
S5/S8	(epi)catechin	CSNK2A1
S5/S8	(epi)catechin	CSNK2B
S5/S8	(epi)catechin	CYP1B1
S5/S8	(epi)catechin	DNMT1
S5/S8	(epi)catechin	EIF3F
S5/S8	(epi)catechin	ESR1
S5/S8	(epi)catechin	ESR2
S5/S8	(epi)catechin	ESRRA
S5/S8	(epi)catechin	ESRRB
S5/S8	(epi)catechin	GPER1
S5/S8	(epi)catechin	HCK
S5/S8	(epi)catechin	HIBCH
S5/S8	(epi)catechin	HSP90AA1
S5/S8	(epi)catechin	HSPA2
S5/S8	(epi)catechin	JAK1
S5/S8	(epi)catechin	NCOA1
S5/S8	(epi)catechin	NCOA2
S5/S8	(epi)catechin	NQO2
S5/S8	(epi)catechin	NR1I2
S5/S8	(epi)catechin	PIK3CG
S5/S8	(epi)catechin	PIM1
S5/S8	(epi)catechin	PTK2B
S5/S8	(epi)catechin	RUVBL2
S5/S8	(epi)catechin	SF3B3
S5/S8	(epi)catechin	SHBG
S5/S8	(epi)catechin	STK17B
S5/S8	(epi)catechin	TOP2A
S5/S8	(epi)catechin	UBA1
S5/S8	(epi)catechin	UGT3A1
S5/S8	(epi)catechin	ARNTL
S5/S8	(epi)catechin	TNF
S5/S8	(epi)catechin	IL1B
S5/S8	(epi)catechin	CAT
S5/S8	(epi)catechin	CASP3
S5/S8	(epi)catechin	PTGS2
S5/S8	(epi)catechin	BAX
S5/S8	(epi)catechin	MAPK1
S5/S8	(epi)catechin	MAPK3
S5/S8	(epi)catechin	BCL2
S5/S8	(epi)catechin	IL6
S5/S8	(epi)catechin	RELA
S5/S8	(epi)catechin	TP53
S5/S8	(epi)catechin	CYP1A1
S5/S8	(epi)catechin	HMOX1
S5/S8	(epi)catechin	SOD2
S5/S8	(epi)catechin	NFE2L2
S5/S8	(epi)catechin	CCL2
S5/S8	(epi)catechin	NQO1
S5/S8	(epi)catechin	NR1H4
S5/S8	(epi)catechin	SOD1
S5/S8	(epi)catechin	NOS2
S5/S8	(epi)catechin	CREB1
S5/S8	(epi)catechin	BDNF
S5/S8	(epi)catechin	CASP9
S5/S8	(epi)catechin	CDKN1A
S5/S8	(epi)catechin	CTNNB1
S5/S8	(epi)catechin	DDIT3
S5/S8	(epi)catechin	PARP1
S5/S8	(epi)catechin	EDN1
S5/S8	(epi)catechin	EGFR
S5/S8	(epi)catechin	S100B
S5/S8	(epi)catechin	STAT3
S5/S8	(epi)catechin	BCL2L1
S5/S8	(epi)catechin	COX2
S5/S8	(epi)catechin	F2
S5/S8	(epi)catechin	MCL1
S5/S8	(epi)catechin	MPO
S5/S8	(epi)catechin	NR0B2
S5/S8	(epi)catechin	TRP53
S5/S8	(epi)catechin	XDH
S5/S8	(epi)catechin	ABCB11
S5/S8	(epi)catechin	CLOCK
S5/S8	(epi)catechin	MFGE8
S5/S8	(epi)catechin	MFN1
S5/S8	(epi)catechin	MFN2
S5/S8	(epi)catechin	MYC
S5/S8	(epi)catechin	TLR4
S5/S8	(epi)catechin	ALB
S5/S8	(epi)catechin	BNIP3
S5/S8	(epi)catechin	COX4
S5/S8	(epi)catechin	COX6C
S5/S8	(epi)catechin	F3
S5/S8	(epi)catechin	FIS1
S5/S8	(epi)catechin	GLI1
S5/S8	(epi)catechin	GPX1
S5/S8	(epi)catechin	HRAS
S5/S8	(epi)catechin	KLF4
S5/S8	(epi)catechin	MAPK8
S5/S8	(epi)catechin	MIR122
S5/S8	(epi)catechin	ND1
S5/S8	(epi)catechin	NDUFS1
S5/S8	(epi)catechin	SLC31A1
S5/S8	(epi)catechin	UQCRC2
S5/S8	(epi)catechin	VEGFA
S5/S8	(epi)catechin	CASP8
S5/S8	(epi)catechin	CCND1
S5/S8	(epi)catechin	CDKN2A
S5/S8	(epi)catechin	CYP2E1
S5/S8	(epi)catechin	EGF
S5/S8	(epi)catechin	FOXO1
S5/S8	(epi)catechin	GADD45A
S5/S8	(epi)catechin	GSR
S5/S8	(epi)catechin	H2AX
S5/S8	(epi)catechin	HIF1A
S5/S8	(epi)catechin	INS1
S5/S8	(epi)catechin	MMP2
S5/S8	(epi)catechin	MMP7
S6	5,7-Dihydroxy-2-(4-hydroxyphenyl)6,8-bis[3,4,5-trihydroxy-6(hydroxymethyl)oxan-2-yl]-2,3dihydrochromen-4-one	No acceptable target was found for this phytochemical
S7	Vicenin 2	AHR
S7	Vicenin 2	ALDH2
S7	Vicenin 2	AR
S7	Vicenin 2	AURKB
S7	Vicenin 2	CBR1
S9	Zizyphusine	ACHE
S9	Zizyphusine	ADRA2A
S9	Zizyphusine	ADRA2B
S9	Zizyphusine	ADRA2C
S9	Zizyphusine	CALY
S9	Zizyphusine	CHRM2
S9	Zizyphusine	CHRNA2
S9	Zizyphusine	CHRNA7
S9	Zizyphusine	DRD1
S9	Zizyphusine	DRD2
S9	Zizyphusine	DRD3
S9	Zizyphusine	DRD4
S9	Zizyphusine	DRD5
S9	Zizyphusine	HTR1A
S9	Zizyphusine	HTR1B
S9	Zizyphusine	HTR1D
S9	Zizyphusine	HTR2A
S9	Zizyphusine	HTR2B
S9	Zizyphusine	HTR2C
S9	Zizyphusine	HTR3A
S9	Zizyphusine	CMA1
S9	Zizyphusine	PLAU
S9	Zizyphusine	MAPK8
S9	Zizyphusine	CA2
S9	Zizyphusine	MAPK10
S9	Zizyphusine	PAH
S9	Zizyphusine	BACE1
S9	Zizyphusine	BMP2
S9	Zizyphusine	PPIA
S9	Zizyphusine	TREM1
S9	Zizyphusine	KDR
S10	Isovitexin-2″-O-glucopyranoside	CA1
S10	Isovitexin-2″-O-glucopyranoside	FCAR
S10	Isovitexin-2″-O-glucopyranoside	CTSD
S10	Isovitexin-2″-O-glucopyranoside	CA12
S10	Isovitexin-2″-O-glucopyranoside	TGFBR2
S10	Isovitexin-2″-O-glucopyranoside	ALB
S10	Isovitexin-2″-O-glucopyranoside	CFB
S10	Isovitexin-2″-O-glucopyranoside	FAP
S10	Isovitexin-2″-O-glucopyranoside	IMPA1
S10	Isovitexin-2″-O-glucopyranoside	ICAM2
S10	Isovitexin-2″-O-glucopyranoside	BCHE
S10	Isovitexin-2″-O-glucopyranoside	PDE4B
S10	Isovitexin-2″-O-glucopyranoside	MAPK10
S10	Isovitexin-2″-O-glucopyranoside	CTSV
S10	Isovitexin-2″-O-glucopyranoside	TTR
S10	Isovitexin-2″-O-glucopyranoside	ANG
S10	Isovitexin-2″-O-glucopyranoside	HCK
S10	Isovitexin-2″-O-glucopyranoside	APOA2
S10	Isovitexin-2″-O-glucopyranoside	GBA
S10	Isovitexin-2″-O-glucopyranoside	NR1H2
S10	Isovitexin-2″-O-glucopyranoside	STS
S10	Isovitexin-2″-O-glucopyranoside	GSTP1
S10	Isovitexin-2″-O-glucopyranoside	ESR2
S10	Isovitexin-2″-O-glucopyranoside	PNP
S10	Isovitexin-2″-O-glucopyranoside	TREM1
S10	Isovitexin-2″-O-glucopyranoside	PPIA
S10	Isovitexin-2″-O-glucopyranoside	MTAP
S11	Spinosin	AR
S11	Spinosin	ABO
S11	Spinosin	AHR
S11	Spinosin	AKR1C3
S11	Spinosin	ALDH2
S11	Spinosin	CBR1
S11	Spinosin	AURKB
S11	Spinosin	CA1
S11	Spinosin	AKR1B1
S11	Spinosin	FCAR
S11	Spinosin	CTSD
S11	Spinosin	TGFBR2
S11	Spinosin	CA12
S11	Spinosin	CA2
S11	Spinosin	RTN4R
S11	Spinosin	EGFR
S11	Spinosin	LGALS7
S11	Spinosin	FAP
S11	Spinosin	IMPA1
S11	Spinosin	DDX6
S11	Spinosin	ICAM2
S11	Spinosin	BCHE
S11	Spinosin	PDE4B
S11	Spinosin	ESR1
S11	Spinosin	TTR
S11	Spinosin	HCK
S11	Spinosin	GBA
S11	Spinosin	GSTP1
S11	Spinosin	PIM1
S11	Spinosin	CHEK1
S11	Spinosin	ESR2
S11	Spinosin	PNP
S11	Spinosin	HSD17B1
S11	Spinosin	TREM1
S11	Spinosin	NUDT9
S11	Spinosin	PPIA
S11	Spinosin	MTAP
S12	Isovitexin	AR
S12	Isovitexin	AHR
S12	Isovitexin	AKR1C3
S12	Isovitexin	ALDH2
S12	Isovitexin	CBR1
S12	Isovitexin	AURKB
S13	Swertisin	AR
S13	Swertisin	AHR
S13	Swertisin	AKR1C3
S13	Swertisin	ALDH2
S13	Swertisin	CBR1
S13	Swertisin	AURKB
S13	Swertisin	MTTP
S13	Swertisin	SHBG
S13	Swertisin	SOAT1
S13	Swertisin	SOAT2
S15	Nicotiflorin	AR
S15	Nicotiflorin	AHR
S15	Nicotiflorin	AKR1C3
S15	Nicotiflorin	ALDH2
S15	Nicotiflorin	CBR1
S15	Nicotiflorin	AURKB
S15	Nicotiflorin	DNMT1
S22	Oleuropein	KIF11
S22	Oleuropein	AKR1B1
S22	Oleuropein	FCAR
S22	Oleuropein	CTSD
S22	Oleuropein	CA12
S22	Oleuropein	TGFBR2
S22	Oleuropein	MAOB
S22	Oleuropein	CA2
S22	Oleuropein	EPHB4
S22	Oleuropein	RTN4R
S22	Oleuropein	CFB
S22	Oleuropein	FAP
S22	Oleuropein	EGFR
S22	Oleuropein	CMA1
S22	Oleuropein	DDX6
S22	Oleuropein	BCHE
S22	Oleuropein	MAPK10
S22	Oleuropein	MMP3
S22	Oleuropein	CCNA2
S22	Oleuropein	NPR3
S22	Oleuropein	TTR
S22	Oleuropein	ANXA5
S22	Oleuropein	ANG
S22	Oleuropein	HCK
S22	Oleuropein	MAPK1
S22	Oleuropein	GBA
S22	Oleuropein	NR1H2
S22	Oleuropein	MAPK8
S22	Oleuropein	GSTP1
S22	Oleuropein	PIM1
S22	Oleuropein	F2
S22	Oleuropein	CHEK1
S22	Oleuropein	ESR2
S22	Oleuropein	PNP
S22	Oleuropein	PYGL
S22	Oleuropein	TREM1
S22	Oleuropein	CDK2
S22	Oleuropein	NUDT9
S22	Oleuropein	PPIA
S22	Oleuropein	MAPK14
S22	Oleuropein	MTAP
S23	6''-O-feruloylspinosin	COX1
S23	6''-O-feruloylspinosin	COX2
S24/26	Jujuboside A(B)	ATP1A1
S24/26	Jujuboside A(B)	ATP1A2
S24/26	Jujuboside A(B)	ATP1A3
S24/26	Jujuboside A(B)	CASP3
S24/26	Jujuboside A(B)	GABRB3
S24/26	Jujuboside A(B)	GLRA3
S24/26	Jujuboside A(B)	HSD11B1
S24/26	Jujuboside A(B)	IL1B
S24/26	Jujuboside A(B)	IL6
S24/26	Jujuboside A(B)	LPL
S24/26	Jujuboside A(B)	NFKB1
S24/26	Jujuboside A(B)	NFKB2
S24/26	Jujuboside A(B)	NR3C1
S24/26	Jujuboside A(B)	PPP1CC
S24/26	Jujuboside A(B)	SLCO1B3
S24/26	Jujuboside A(B)	TNF
S24/26	Jujuboside A(B)	VDR
S24/26	Jujuboside A(B)	YWHAE
S24/26	Jujuboside A(B)	GC
S24/26	Jujuboside A(B)	CA1
S24/26	Jujuboside A(B)	KIF11
S24/26	Jujuboside A(B)	CA12
S24/26	Jujuboside A(B)	TGFBR2
S24/26	Jujuboside A(B)	ALB
S24/26	Jujuboside A(B)	CA2
S24/26	Jujuboside A(B)	CFB
S24/26	Jujuboside A(B)	RTN4R
S24/26	Jujuboside A(B)	BACE1
S24/26	Jujuboside A(B)	FAP
S24/26	Jujuboside A(B)	PDE4D
S24/26	Jujuboside A(B)	AKR1C2
S24/26	Jujuboside A(B)	PDE4B
S24/26	Jujuboside A(B)	MAPK10
S24/26	Jujuboside A(B)	MMP3
S24/26	Jujuboside A(B)	ESR1
S24/26	Jujuboside A(B)	TTR
S24/26	Jujuboside A(B)	CASP7
S24/26	Jujuboside A(B)	BMP2
S24/26	Jujuboside A(B)	CDK5R1
S24/26	Jujuboside A(B)	GBA
S24/26	Jujuboside A(B)	NR1H2
S24/26	Jujuboside A(B)	MMP13
S24/26	Jujuboside A(B)	STS
S24/26	Jujuboside A(B)	ADAM17
S24/26	Jujuboside A(B)	GSTP1
S24/26	Jujuboside A(B)	SULT2A1
S24/26	Jujuboside A(B)	MAPKAPK2
S24/26	Jujuboside A(B)	TREM1
S24/26	Jujuboside A(B)	AMY1C
S24/26	Jujuboside A(B)	AMY1B
S24/26	Jujuboside A(B)	AMY1A
S24/26	Jujuboside A(B)	PPIA
S24/26	Jujuboside A(B)	PIM1
S24/26	Jujuboside A(B)	MTAP
S25/27/29	octadecenoic acid	ABL1
S25/27/29	octadecenoic acid	ACSL3
S25/27/29	octadecenoic acid	ACSL4
S25/27/29	octadecenoic acid	ADH5
S25/27/29	octadecenoic acid	ARF1
S25/27/29	octadecenoic acid	ARF6
S25/27/29	octadecenoic acid	C8G
S25/27/29	octadecenoic acid	CALM1
S25/27/29	octadecenoic acid	CNR1
S25/27/29	octadecenoic acid	CNR2
S25/27/29	octadecenoic acid	CYP2C8
S25/27/29	octadecenoic acid	ECI2
S25/27/29	octadecenoic acid	ELOVL4
S25/27/29	octadecenoic acid	FADS1
S25/27/29	octadecenoic acid	FADS2
S25/27/29	octadecenoic acid	FFAR1
S25/27/29	octadecenoic acid	FKBP1A
S25/27/29	octadecenoic acid	FURIN
S25/27/29	octadecenoic acid	GLTP
S25/27/29	octadecenoic acid	GM2A
S25/27/29	octadecenoic acid	GUCA1A
S25/27/29	octadecenoic acid	HNF4A
S25/27/29	octadecenoic acid	HNF4G
S25/27/29	octadecenoic acid	INS
S25/27/29	octadecenoic acid	LALBA
S25/27/29	octadecenoic acid	LIP3
S25/27/29	octadecenoic acid	LIPB
S25/27/29	octadecenoic acid	LTB4R
S25/27/29	octadecenoic acid	LTB4R2
S25/27/29	octadecenoic acid	LTF
S25/27/29	octadecenoic acid	LY96
S25/27/29	octadecenoic acid	NCOA1
S25/27/29	octadecenoic acid	NR1H4
S25/27/29	octadecenoic acid	PAEP
S25/27/29	octadecenoic acid	PKIA
S25/27/29	octadecenoic acid	PLA2G1B
S25/27/29	octadecenoic acid	PLA2G2A
S25/27/29	octadecenoic acid	PLA2G2D
S25/27/29	octadecenoic acid	PLA2G2E
S25/27/29	octadecenoic acid	PMP2
S25/27/29	octadecenoic acid	PPARA
S25/27/29	octadecenoic acid	PPARD
S25/27/29	octadecenoic acid	PPARG
S25/27/29	octadecenoic acid	PPP3CA
S25/27/29	octadecenoic acid	PPP3R1
S25/27/29	octadecenoic acid	PPT1
S25/27/29	octadecenoic acid	PRKACA
S25/27/29	octadecenoic acid	PTGS1
S25/27/29	octadecenoic acid	PTGS2
S25/27/29	octadecenoic acid	PVR
S25/27/29	octadecenoic acid	RCVRN
S25/27/29	octadecenoic acid	RHO
S25/27/29	octadecenoic acid	RXRA
S25/27/29	octadecenoic acid	RXRB
S25/27/29	octadecenoic acid	RXRG
S25/27/29	octadecenoic acid	S100B
S25/27/29	octadecenoic acid	SEC14L2
S25/27/29	octadecenoic acid	SLC8A1
S25/27/29	octadecenoic acid	SREBF1
S25/27/29	octadecenoic acid	TLR4
S25/27/29	octadecenoic acid	TRAPPC3
S25/27/29	octadecenoic acid	TRPV1
S25/27/29	octadecenoic acid	VLDLR
S28/31	(epi)ceanothic acid	AR
S28/31	(epi)ceanothic acid	CASP8
S28/31	(epi)ceanothic acid	CAT
S28/31	(epi)ceanothic acid	CAT3
S28/31	(epi)ceanothic acid	HOXA10
S28/31	(epi)ceanothic acid	HSD11B1
S28/31	(epi)ceanothic acid	HSD11B2
S28/31	(epi)ceanothic acid	NCOA1
S28/31	(epi)ceanothic acid	NPPB
S28/31	(epi)ceanothic acid	NR1H4
S28/31	(epi)ceanothic acid	NR1I2
S28/31	(epi)ceanothic acid	PTGS1
S28/31	(epi)ceanothic acid	VDR
S28/31	(epi)ceanothic acid	CA1
S28/31	(epi)ceanothic acid	GC
S28/31	(epi)ceanothic acid	KIF11
S28/31	(epi)ceanothic acid	ALB
S28/31	(epi)ceanothic acid	MAOB
S28/31	(epi)ceanothic acid	CA2
S28/31	(epi)ceanothic acid	LTF
S28/31	(epi)ceanothic acid	CFB
S28/31	(epi)ceanothic acid	AR
S28/31	(epi)ceanothic acid	FAP
S28/31	(epi)ceanothic acid	PRDX5
S28/31	(epi)ceanothic acid	SRC
S28/31	(epi)ceanothic acid	AKR1C2
S28/31	(epi)ceanothic acid	MIF
S28/31	(epi)ceanothic acid	FKBP1A
S28/31	(epi)ceanothic acid	BCHE
S28/31	(epi)ceanothic acid	CASP3
S28/31	(epi)ceanothic acid	MAPK10
S28/31	(epi)ceanothic acid	DHODH
S28/31	(epi)ceanothic acid	TTR
S28/31	(epi)ceanothic acid	MAPK1
S28/31	(epi)ceanothic acid	BMP2
S28/31	(epi)ceanothic acid	APOA2
S28/31	(epi)ceanothic acid	NR1H2
S28/31	(epi)ceanothic acid	MAPK8
S28/31	(epi)ceanothic acid	HSD17B11
S28/31	(epi)ceanothic acid	LCN2
S28/31	(epi)ceanothic acid	STS
S28/31	(epi)ceanothic acid	ADAM17
S28/31	(epi)ceanothic acid	GSTP1
S28/31	(epi)ceanothic acid	F2
S28/31	(epi)ceanothic acid	SULT2A1
S28/31	(epi)ceanothic acid	BCAT2
S28/31	(epi)ceanothic acid	PPARG
S28/31	(epi)ceanothic acid	HSD17B1
S28/31	(epi)ceanothic acid	MAPKAPK2
S28/31	(epi)ceanothic acid	TREM1
S28/31	(epi)ceanothic acid	THRB
S28/31	(epi)ceanothic acid	PPIA
S28/31	(epi)ceanothic acid	KDR
S28/31	(epi)ceanothic acid	RIDA
S28/31	(epi)ceanothic acid	CYP19A1
S28/31	(epi)ceanothic acid	PLG
S28/31	(epi)ceanothic acid	PIM1
S30	Alphitolic acid	ADH1C
S30	Alphitolic acid	AKR1C2
S30	Alphitolic acid	AR
S30	Alphitolic acid	CAT
S30	Alphitolic acid	CAT3
S30	Alphitolic acid	CES1
S30	Alphitolic acid	COX4I1
S30	Alphitolic acid	COX5A
S30	Alphitolic acid	COX5B
S30	Alphitolic acid	COX6A2
S30	Alphitolic acid	COX6B1
S30	Alphitolic acid	COX6C
S30	Alphitolic acid	COX7A1
S30	Alphitolic acid	COX7B
S30	Alphitolic acid	COX7C
S30	Alphitolic acid	COX8A
S30	Alphitolic acid	ESRRG
S30	Alphitolic acid	FABP6
S30	Alphitolic acid	FECH
S30	Alphitolic acid	GPBAR1
S30	Alphitolic acid	GSTP1
S30	Alphitolic acid	HOXA10
S30	Alphitolic acid	HSD11B1
S30	Alphitolic acid	HSD11B2
S30	Alphitolic acid	NCOA1
S30	Alphitolic acid	NPPB
S30	Alphitolic acid	NR1H4
S30	Alphitolic acid	NR1I2
S30	Alphitolic acid	PLA2G1B
S30	Alphitolic acid	PPP1CC
S30	Alphitolic acid	VDR
S32	Betulinic acid	ADH1C
S32	Betulinic acid	AKR1C1
S32	Betulinic acid	AKR1C2
S32	Betulinic acid	AR
S32	Betulinic acid	CAT
S32	Betulinic acid	CAT3
S32	Betulinic acid	CES1
S32	Betulinic acid	COX4I1
S32	Betulinic acid	COX5A
S32	Betulinic acid	COX5B
S32	Betulinic acid	COX6A2
S32	Betulinic acid	COX6B1
S32	Betulinic acid	COX6C
S32	Betulinic acid	COX7A1
S32	Betulinic acid	COX7B
S32	Betulinic acid	COX7C
S32	Betulinic acid	COX8A
S32	Betulinic acid	CYP27B1
S32	Betulinic acid	ESR1
S32	Betulinic acid	ESR2
S32	Betulinic acid	ESRRG
S32	Betulinic acid	FABP6
S32	Betulinic acid	FECH
S32	Betulinic acid	GABRA1
S32	Betulinic acid	GABRA2
S32	Betulinic acid	GABRA3
S32	Betulinic acid	GABRA4
S32	Betulinic acid	GABRA5
S32	Betulinic acid	GABRA6
S32	Betulinic acid	GABRB1
S32	Betulinic acid	GABRB2
S32	Betulinic acid	GABRB3
S32	Betulinic acid	GABRD
S32	Betulinic acid	GABRE
S32	Betulinic acid	GABRG1
S32	Betulinic acid	GABRG2
S32	Betulinic acid	GABRG3
S32	Betulinic acid	GABRP
S32	Betulinic acid	GABRQ
S32	Betulinic acid	GPBAR1
S32	Betulinic acid	GRIN1
S32	Betulinic acid	GRIN2A
S32	Betulinic acid	GRIN2B
S32	Betulinic acid	GRIN2C
S32	Betulinic acid	GRIN2D
S32	Betulinic acid	GRIN3A
S32	Betulinic acid	GRIN3B
S32	Betulinic acid	GSTP1
S32	Betulinic acid	HOXA10
S32	Betulinic acid	HSD11B1
S32	Betulinic acid	HSD11B2
S32	Betulinic acid	HSD17B1
S32	Betulinic acid	LSS
S32	Betulinic acid	NCOA1
S32	Betulinic acid	NCOA2
S32	Betulinic acid	NFKB1
S32	Betulinic acid	NFKB2
S32	Betulinic acid	NPPB
S32	Betulinic acid	NR1H4
S32	Betulinic acid	NR1I2
S32	Betulinic acid	NR1I3
S32	Betulinic acid	NR3C1
S32	Betulinic acid	NR3C2
S32	Betulinic acid	PGR
S32	Betulinic acid	PLA2G1B
S32	Betulinic acid	PPARA
S32	Betulinic acid	PRLR
S32	Betulinic acid	RXRA
S32	Betulinic acid	SIGMAR1
S32	Betulinic acid	SULT2A1
S32	Betulinic acid	SULT2B1
S32	Betulinic acid	VDR
S33	Linoleic acid	ABL1
S33	Linoleic acid	ACSL3
S33	Linoleic acid	ACSL4
S33	Linoleic acid	ADH5
S33	Linoleic acid	ARF1
S33	Linoleic acid	ARF6
S33	Linoleic acid	C8G
S33	Linoleic acid	CALM1
S33	Linoleic acid	CNR1
S33	Linoleic acid	CNR2
S33	Linoleic acid	CYP2C8
S33	Linoleic acid	ECI2
S33	Linoleic acid	ELOVL4
S33	Linoleic acid	FADS1
S33	Linoleic acid	FADS2
S33	Linoleic acid	FFAR1
S33	Linoleic acid	FKBP1A
S33	Linoleic acid	FURIN
S33	Linoleic acid	GLTP
S33	Linoleic acid	GM2A
S33	Linoleic acid	GUCA1A
S33	Linoleic acid	HNF4A
S33	Linoleic acid	HNF4G
S33	Linoleic acid	INS
S33	Linoleic acid	LALBA
S33	Linoleic acid	LIP3
S33	Linoleic acid	lipB
S33	Linoleic acid	LTB4R
S33	Linoleic acid	LTB4R2
S33	Linoleic acid	LTF
S33	Linoleic acid	LY96
S33	Linoleic acid	NCOA1
S33	Linoleic acid	NR1H4
S33	Linoleic acid	PAEP
S33	Linoleic acid	PKIA
S33	Linoleic acid	PLA2G1B
S33	Linoleic acid	PLA2G2A
S33	Linoleic acid	PLA2G2D
S33	Linoleic acid	PLA2G2E
S33	Linoleic acid	PMP2
S33	Linoleic acid	PPARA
S33	Linoleic acid	PPARD
S33	Linoleic acid	PPARG
S33	Linoleic acid	PPP3CA
S33	Linoleic acid	PPP3R1
S33	Linoleic acid	PPT1
S33	Linoleic acid	PRKACA
S33	Linoleic acid	PTGS1
S33	Linoleic acid	PTGS2
S33	Linoleic acid	PVR
S33	Linoleic acid	RCVRN
S33	Linoleic acid	RHO
S33	Linoleic acid	RXRA
S33	Linoleic acid	RXRB
S33	Linoleic acid	RXRG
S33	Linoleic acid	S100B
S33	Linoleic acid	SEC14L2
S33	Linoleic acid	SLC8A1
S33	Linoleic acid	SREBF1
S33	Linoleic acid	TLR4
S33	Linoleic acid	TRAPPC3
S33	Linoleic acid	TRPV1
S33	Linoleic acid	VLDLR
S33	Linoleic acid	ABCA1
S33	Linoleic acid	TNF
S33	Linoleic acid	CASP3
S33	Linoleic acid	AGER
S33	Linoleic acid	IL6
S33	Linoleic acid	NFE2L2
S33	Linoleic acid	ANXA5
S33	Linoleic acid	PON1
S33	Linoleic acid	VCAM1
S33	Linoleic acid	ALB
S34	Palmitic acid	ABAT
S34	Palmitic acid	ABL1
S34	Palmitic acid	ACADSB
S34	Palmitic acid	ACOX1
S34	Palmitic acid	ACSL3
S34	Palmitic acid	ACSL4
S34	Palmitic acid	ADH5
S34	Palmitic acid	ALDH5A1
S34	Palmitic acid	ARF1
S34	Palmitic acid	ARF6
S34	Palmitic acid	C8G
S34	Palmitic acid	CALM1
S34	Palmitic acid	CNR1
S34	Palmitic acid	CNR2
S34	Palmitic acid	CYP2C8
S34	Palmitic acid	ECI2
S34	Palmitic acid	ELOVL4
S34	Palmitic acid	FADS1
S34	Palmitic acid	FADS2
S34	Palmitic acid	FFAR1
S34	Palmitic acid	FKBP1A
S34	Palmitic acid	FURIN
S34	Palmitic acid	GLTP
S34	Palmitic acid	GM2A
S34	Palmitic acid	GUCA1A
S34	Palmitic acid	HAO1
S34	Palmitic acid	HDAC2
S34	Palmitic acid	HDAC9
S34	Palmitic acid	HNF4A
S34	Palmitic acid	HNF4G
S34	Palmitic acid	INS
S34	Palmitic acid	LALBA
S34	Palmitic acid	LIP3
S34	Palmitic acid	lipB
S34	Palmitic acid	LTB4R
S34	Palmitic acid	LTB4R2
S34	Palmitic acid	LTF
S34	Palmitic acid	LY96
S34	Palmitic acid	NCOA1
S34	Palmitic acid	NR1H4
S34	Palmitic acid	OGDH
S34	Palmitic acid	PAEP
S34	Palmitic acid	PKIA
S34	Palmitic acid	PLA2G1B
S34	Palmitic acid	PLA2G2A
S34	Palmitic acid	PLA2G2D
S34	Palmitic acid	PLA2G2E
S34	Palmitic acid	PMP2
S34	Palmitic acid	PPARA
S34	Palmitic acid	PPARD
S34	Palmitic acid	PPARG
S34	Palmitic acid	PPP3CA
S34	Palmitic acid	PPP3R1
S34	Palmitic acid	PPT1
S34	Palmitic acid	PRKACA
S34	Palmitic acid	PTGS1
S34	Palmitic acid	PTGS2
S34	Palmitic acid	PVR
S34	Palmitic acid	RCVRN
S34	Palmitic acid	RHO
S34	Palmitic acid	RXRA
S34	Palmitic acid	RXRB
S34	Palmitic acid	RXRG
S34	Palmitic acid	S100B
S34	Palmitic acid	SCN10A
S34	Palmitic acid	SCN11A
S34	Palmitic acid	SCN1A
S34	Palmitic acid	SCN1B
S34	Palmitic acid	SCN2A
S34	Palmitic acid	SCN2B
S34	Palmitic acid	SCN3A
S34	Palmitic acid	SCN3B
S34	Palmitic acid	SCN4A
S34	Palmitic acid	SCN4B
S34	Palmitic acid	SCN5A
S34	Palmitic acid	SCN7A
S34	Palmitic acid	SCN8A
S34	Palmitic acid	SCN9A
S34	Palmitic acid	SEC14L2
S34	Palmitic acid	SLC8A1
S34	Palmitic acid	SREBF1
S34	Palmitic acid	TLR4
S34	Palmitic acid	TRAPPC3
S34	Palmitic acid	TRPV1
S34	Palmitic acid	VLDLR
S34	Palmitic acid	TNF
S34	Palmitic acid	CASP3
S34	Palmitic acid	IL6
S34	Palmitic acid	CASP7
S34	Palmitic acid	RELA
S34	Palmitic acid	SIRT1
S34	Palmitic acid	IL1B
S34	Palmitic acid	CPT1A
S34	Palmitic acid	NOS2
S34	Palmitic acid	FASN
S34	Palmitic acid	MAPK8
S34	Palmitic acid	INS1
S34	Palmitic acid	NLRP3
S34	Palmitic acid	SCD1
S34	Palmitic acid	CCL2
S34	Palmitic acid	ERN1
S34	Palmitic acid	FOXO1
S34	Palmitic acid	MAPK1
S34	Palmitic acid	MAPK3
S34	Palmitic acid	NOS3
S34	Palmitic acid	ARG1
S34	Palmitic acid	DDIT3
S34	Palmitic acid	GCG
S34	Palmitic acid	HSPA5
S34	Palmitic acid	NR1H2
S34	Palmitic acid	NR1H3
S34	Palmitic acid	PDX1
S34	Palmitic acid	SORT1
S34	Palmitic acid	XBP1
S34	Palmitic acid	AKT1
S34	Palmitic acid	ALB
S34	Palmitic acid	ATG7
S34	Palmitic acid	CXCL8
S34	Palmitic acid	IRS2
S34	Palmitic acid	ADIPOQ
S34	Palmitic acid	BECN1
S34	Palmitic acid	CASP1
S34	Palmitic acid	CCL3
S34	Palmitic acid	CYBA
S34	Palmitic acid	CYBB
S34	Palmitic acid	EIF2AK2
S34	Palmitic acid	EIF2S1
S34	Palmitic acid	IRS1
S34	Palmitic acid	MTOR
S34	Palmitic acid	NFKB1
S34	Palmitic acid	NFKBIA
S34	Palmitic acid	SQSTM1
S34	Palmitic acid	VCAM1
S35	Oleic Acid	TNF
S35	Oleic Acid	PPARA
S35	Oleic Acid	ALB
S35	Oleic Acid	CPT1A
S35	Oleic Acid	IL6
S35	Oleic Acid	PLIN2
S35	Oleic Acid	INS
S35	Oleic Acid	SREBF1
S35	Oleic Acid	APOB
S35	Oleic Acid	PPARG
S35	Oleic Acid	PARP1
S35	Oleic Acid	PCK1
S35	Oleic Acid	PON1
S35	Oleic Acid	ABCA1
S35	Oleic Acid	AKT1
S35	Oleic Acid	CPT2
S35	Oleic Acid	CYP2B6
S35	Oleic Acid	CYP2E1
S35	Oleic Acid	FASN
S35	Oleic Acid	NR1H4
S35	Oleic Acid	ACOX1
S35	Oleic Acid	CAT
S35	Oleic Acid	CD36
S35	Oleic Acid	ELOVL6
S35	Oleic Acid	FABP1
S35	Oleic Acid	GLP1R
S35	Oleic Acid	GSK3B
S35	Oleic Acid	INSR
S35	Oleic Acid	SCD
S35	Oleic Acid	SCD1
S35	Oleic Acid	SERPINE1
S35	Oleic Acid	CXCL8
S35	Oleic Acid	HADHA
S35	Oleic Acid	HADHB
S35	Oleic Acid	NR1H3
S35	Oleic Acid	NR1I3
S35	Oleic Acid	PLIN4
S35	Oleic Acid	SIRT1
S35	Oleic Acid	ACAA2
S35	Oleic Acid	ACADM
S35	Oleic Acid	ACADS
S35	Oleic Acid	ACOT12
S35	Oleic Acid	AGPAT2
S35	Oleic Acid	APOA5
S35	Oleic Acid	ECH1
S35	Oleic Acid	MTTP
S35	Oleic Acid	PDK4
S35	Oleic Acid	PPARB
S35	Oleic Acid	PPARD
S35	Oleic Acid	ABL1
S35	Oleic Acid	ACSL3
S35	Oleic Acid	ACSL4
S35	Oleic Acid	ADH5
S35	Oleic Acid	ARF1
S35	Oleic Acid	ARF6
S35	Oleic Acid	C8G
S35	Oleic Acid	CALM1
S35	Oleic Acid	CNR1
S35	Oleic Acid	CNR2
S35	Oleic Acid	CYP2C8
S35	Oleic Acid	ECI2
S35	Oleic Acid	ELOVL4
S35	Oleic Acid	FADS1
S35	Oleic Acid	FADS2
S35	Oleic Acid	FFAR1
S35	Oleic Acid	FKBP1A
S35	Oleic Acid	FURIN
S35	Oleic Acid	GLTP
S35	Oleic Acid	GM2A
S35	Oleic Acid	GUCA1A
S35	Oleic Acid	HNF4A
S35	Oleic Acid	HNF4G
S35	Oleic Acid	LALBA
S35	Oleic Acid	LIP3
S35	Oleic Acid	lipB
S35	Oleic Acid	LTB4R
S35	Oleic Acid	LTB4R2
S35	Oleic Acid	LTF
S35	Oleic Acid	LY96
S35	Oleic Acid	NCOA1
S35	Oleic Acid	PAEP
S35	Oleic Acid	PKIA
S35	Oleic Acid	PLA2G1B
S35	Oleic Acid	PLA2G2A
S35	Oleic Acid	PLA2G2D
S35	Oleic Acid	PLA2G2E
S35	Oleic Acid	PMP2
S35	Oleic Acid	PPP3CA
S35	Oleic Acid	PPP3R1
S35	Oleic Acid	PPT1
S35	Oleic Acid	PRKACA
S35	Oleic Acid	PTGS1
S35	Oleic Acid	PTGS2
S35	Oleic Acid	PVR
S35	Oleic Acid	RCVRN
S35	Oleic Acid	RHO
S35	Oleic Acid	RXRA
S35	Oleic Acid	RXRB
S35	Oleic Acid	RXRG
S35	Oleic Acid	S100B
S35	Oleic Acid	SEC14L2
S35	Oleic Acid	SLC8A1
S35	Oleic Acid	TLR4
S35	Oleic Acid	TRAPPC3
S35	Oleic Acid	TRPV1
S35	Oleic Acid	VLDLR
S6-m	Naringenin	ACTB
S6-m	Naringenin	AHR
S6-m	Naringenin	AKR1C1
S6-m	Naringenin	AKT1
S6-m	Naringenin	ATP5A1
S6-m	Naringenin	ATP5B
S6-m	Naringenin	ATP5C1
S6-m	Naringenin	CBR1
S6-m	Naringenin	CDK6
S6-m	Naringenin	CEBPB
S6-m	Naringenin	CSNK2A1
S6-m	Naringenin	CSNK2B
S6-m	Naringenin	CYP19A1
S6-m	Naringenin	CYP1B1
S6-m	Naringenin	EIF3F
S6-m	Naringenin	ESR1
S6-m	Naringenin	ESR2
S6-m	Naringenin	ESRRA
S6-m	Naringenin	ESRRB
S6-m	Naringenin	GPER1
S6-m	Naringenin	HCK
S6-m	Naringenin	HIBCH
S6-m	Naringenin	HSP90AA1
S6-m	Naringenin	HSPA2
S6-m	Naringenin	IGHG1
S6-m	Naringenin	JAK1
S6-m	Naringenin	KANSL3
S6-m	Naringenin	MTTP
S6-m	Naringenin	NCOA1
S6-m	Naringenin	NCOA2
S6-m	Naringenin	NQO2
S6-m	Naringenin	NR1I2
S6-m	Naringenin	PIK3CG
S6-m	Naringenin	PIM1
S6-m	Naringenin	PTK2B
S6-m	Naringenin	RUVBL2
S6-m	Naringenin	SF3B3
S6-m	Naringenin	SHBG
S6-m	Naringenin	SOAT1
S6-m	Naringenin	SOAT2
S6-m	Naringenin	STK17B
S6-m	Naringenin	TOP2A
S6-m	Naringenin	UBA1
S6-m	Naringenin	UGT3A1
S6-m	Naringenin	HMOX1
S6-m	Naringenin	TNF
S6-m	Naringenin	ABCC1
S6-m	Naringenin	KCNH2
S6-m	Naringenin	CAT
S6-m	Naringenin	NOS2
S6-m	Naringenin	BCL2
S6-m	Naringenin	CASP3
S6-m	Naringenin	CYP1A1
S6-m	Naringenin	BAX
S6-m	Naringenin	NFE2L2
S6-m	Naringenin	CASP9
S6-m	Naringenin	MAPK1
S6-m	Naringenin	MAPK3
S6-m	Naringenin	MMP9
S6-m	Naringenin	PPARG
S11-m	Apigenin	ACTB
S11-m	Apigenin	AHR
S11-m	Apigenin	AKR1C1
S11-m	Apigenin	AKT1
S11-m	Apigenin	ATP5A1
S11-m	Apigenin	ATP5B
S11-m	Apigenin	ATP5C1
S11-m	Apigenin	CBR1
S11-m	Apigenin	CDK6
S11-m	Apigenin	CEBPB
S11-m	Apigenin	CSNK2A1
S11-m	Apigenin	CSNK2B
S11-m	Apigenin	CYP19A1
S11-m	Apigenin	CYP1B1
S11-m	Apigenin	EIF3F
S11-m	Apigenin	ESR1
S11-m	Apigenin	ESR2
S11-m	Apigenin	ESRRA
S11-m	Apigenin	ESRRB
S11-m	Apigenin	GPER1
S11-m	Apigenin	HCK
S11-m	Apigenin	HIBCH
S11-m	Apigenin	HSP90AA1
S11-m	Apigenin	HSPA2
S11-m	Apigenin	IGHG1
S11-m	Apigenin	JAK1
S11-m	Apigenin	KANSL3
S11-m	Apigenin	NCOA1
S11-m	Apigenin	NCOA2
S11-m	Apigenin	NQO2
S11-m	Apigenin	NR1I2
S11-m	Apigenin	PIK3CG
S11-m	Apigenin	PIM1
S11-m	Apigenin	PTK2B
S11-m	Apigenin	RUVBL2
S11-m	Apigenin	SF3B3
S11-m	Apigenin	SHBG
S11-m	Apigenin	STK17B
S11-m	Apigenin	TOP2A
S11-m	Apigenin	UBA1
S11-m	Apigenin	UGT3A1
S11-m	Apigenin	TNF
S11-m	Apigenin	CASP3
S11-m	Apigenin	IL1B
S11-m	Apigenin	CYP1A1
S11-m	Apigenin	HIF1A
S11-m	Apigenin	APP
S11-m	Apigenin	CASP9
S11-m	Apigenin	NOS2
S11-m	Apigenin	RELA
S11-m	Apigenin	BCL2
S11-m	Apigenin	IL6
S11-m	Apigenin	NFKBIA
S11-m	Apigenin	BAX
S11-m	Apigenin	HMOX1
S11-m	Apigenin	TNFSF10
S11-m	Apigenin	CDKN1A
S11-m	Apigenin	IFNG
S11-m	Apigenin	IKBKB
S11-m	Apigenin	MAPK1
S11-m	Apigenin	PARP1
S11-m	Apigenin	PTGS2
S11-m	Apigenin	CASP8
S11-m	Apigenin	CAT
S11-m	Apigenin	VEGFA
S11-m	Apigenin	ABCC1
S11-m	Apigenin	ICAM1
S11-m	Apigenin	MAPK3
S11-m	Apigenin	UGT1A1
S13-m	Genkwanin	GABRA1
S13-m	Genkwanin	GABRA2
S13-m	Genkwanin	GABRA3
S13-m	Genkwanin	GABRA4
S13-m	Genkwanin	GABRA5
S13-m	Genkwanin	GABRA6
S13-m	Genkwanin	GABRG1
S13-m	Genkwanin	GABRG2
S13-m	Genkwanin	GABRG3
S13-m	Genkwanin	MTTP
S13-m	Genkwanin	SHBG
S13-m	Genkwanin	SOAT1
S13-m	Genkwanin	SOAT2
S14-m	Vanillic acid	GLO1
S14-m	Vanillic acid	SHBG
S15-m	Kaempferol	CYP1A1
S15-m	Kaempferol	TNF
S15-m	Kaempferol	ESR1
S15-m	Kaempferol	NOS2
S15-m	Kaempferol	AHR
S15-m	Kaempferol	IL1B
S15-m	Kaempferol	IL32
S15-m	Kaempferol	ESR2
S15-m	Kaempferol	CSF2
S15-m	Kaempferol	PTGS2
S15-m	Kaempferol	CASP3
S15-m	Kaempferol	CYP1B1
S15-m	Kaempferol	MAPK1
S15-m	Kaempferol	MAPK3
S15-m	Kaempferol	HMOX1
S15-m	Kaempferol	ARNT
S15-m	Kaempferol	IL6
S15-m	Kaempferol	CYP1A2
S15-m	Kaempferol	PPARG
S15-m	Kaempferol	TP53
S15-m	Kaempferol	NR1I2
S15-m	Kaempferol	ABCC1
S15-m	Kaempferol	CYP3A4
S15-m	Kaempferol	IFNG
S15-m	Kaempferol	NFE2L2
S15-m	Kaempferol	ACTB
S15-m	Kaempferol	AKR1C1
S15-m	Kaempferol	AKT1
S15-m	Kaempferol	ATP5A1
S15-m	Kaempferol	ATP5B
S15-m	Kaempferol	ATP5C1
S15-m	Kaempferol	CA1
S15-m	Kaempferol	CA12
S15-m	Kaempferol	CA14
S15-m	Kaempferol	CA2
S15-m	Kaempferol	CA3
S15-m	Kaempferol	CA4
S15-m	Kaempferol	CA5A
S15-m	Kaempferol	CA5B
S15-m	Kaempferol	CA6
S15-m	Kaempferol	CA7
S15-m	Kaempferol	CA9
S15-m	Kaempferol	CBR1
S15-m	Kaempferol	CDK6
S15-m	Kaempferol	CEBPB
S15-m	Kaempferol	COMT
S15-m	Kaempferol	CSNK2A1
S15-m	Kaempferol	CSNK2B
S15-m	Kaempferol	CYP19A1
S15-m	Kaempferol	DNMT1
S15-m	Kaempferol	EIF3F
S15-m	Kaempferol	ESRRA
S15-m	Kaempferol	ESRRB
S15-m	Kaempferol	GABRA1
S15-m	Kaempferol	GABRA2
S15-m	Kaempferol	GABRA3
S15-m	Kaempferol	GABRA4
S15-m	Kaempferol	GABRA5
S15-m	Kaempferol	GABRA6
S15-m	Kaempferol	GABRG1
S15-m	Kaempferol	GABRG2
S15-m	Kaempferol	GABRG3
S15-m	Kaempferol	GPER1
S15-m	Kaempferol	HCK
S15-m	Kaempferol	HIBCH
S15-m	Kaempferol	HSP90AA1
S15-m	Kaempferol	HSPA2
S15-m	Kaempferol	IGHG1
S15-m	Kaempferol	JAK1
S15-m	Kaempferol	KANSL3
S15-m	Kaempferol	MTTP
S15-m	Kaempferol	NCOA1
S15-m	Kaempferol	NCOA2
S15-m	Kaempferol	NQO2
S15-m	Kaempferol	PIK3CG
S15-m	Kaempferol	PIM1
S15-m	Kaempferol	PRKACA
S15-m	Kaempferol	PRKCA
S15-m	Kaempferol	PRKCB
S15-m	Kaempferol	PTK2B
S15-m	Kaempferol	RUVBL2
S15-m	Kaempferol	SF3B3
S15-m	Kaempferol	SHBG
S15-m	Kaempferol	SOAT1
S15-m	Kaempferol	SOAT2
S15-m	Kaempferol	SQLE
S15-m	Kaempferol	STK17B
S15-m	Kaempferol	SYK
S15-m	Kaempferol	TOP2A
S15-m	Kaempferol	UBA1
S15-m	Kaempferol	UGT3A1
S16-m	para-hydroxybenzoic acid	PTGR1
S16-m	para-hydroxybenzoic acid	TYR
S18-m	sinapic acid	ABCC5
S18-m	sinapic acid	AR
S18-m	sinapic acid	CBR1
S18-m	sinapic acid	GLO1
S18-m	sinapic acid	GSTP1
S18-m	sinapic acid	PPARG
S18-m	sinapic acid	SHBG
S18-m	sinapic acid	VDR
S19-m	para-coumaric acid	PTGR1
S20-m	ferulic acid	NOS2
S20-m	ferulic acid	PTGS2
S21-m	phaseic acid	No acceptable target was found for this phytochemical
S24-m	Jujubogenin	ATP1A1
S24-m	Jujubogenin	ATP1A2
S24-m	Jujubogenin	ATP1A3
S24-m	Jujubogenin	GABRB3
S24-m	Jujubogenin	GLRA3
S24-m	Jujubogenin	NR3C1
S24-m	Jujubogenin	PPP1CC
S24-m	Jujubogenin	SLCO1B3
S24-m	Jujubogenin	GC
S24-m	Jujubogenin	KIF11
S24-m	Jujubogenin	ITGAL
S24-m	Jujubogenin	ALB
S24-m	Jujubogenin	PGR
S24-m	Jujubogenin	MAOB
S24-m	Jujubogenin	CA2
S24-m	Jujubogenin	CFB
S24-m	Jujubogenin	PDE4D
S24-m	Jujubogenin	AKR1C2
S24-m	Jujubogenin	PDE4B
S24-m	Jujubogenin	CASP3
S24-m	Jujubogenin	MAPK10
S24-m	Jujubogenin	MMP3
S24-m	Jujubogenin	CCNA2
S24-m	Jujubogenin	ESR1
S24-m	Jujubogenin	TTR
S24-m	Jujubogenin	CASP7
S24-m	Jujubogenin	PIK3CG
S24-m	Jujubogenin	MAPK1
S24-m	Jujubogenin	BMP2
S24-m	Jujubogenin	NR1H4
S24-m	Jujubogenin	CES1
S24-m	Jujubogenin	APOA2
S24-m	Jujubogenin	MAPK8
S24-m	Jujubogenin	CLPP
S24-m	Jujubogenin	STS
S24-m	Jujubogenin	GSTP1
S24-m	Jujubogenin	F2
S24-m	Jujubogenin	ESRRG
S24-m	Jujubogenin	HSD17B1
S24-m	Jujubogenin	TREM1
S24-m	Jujubogenin	THRB
S24-m	Jujubogenin	GSR
S24-m	Jujubogenin	CDK2
S24-m	Jujubogenin	PPIA
S24-m	Jujubogenin	KDR
S24-m	Jujubogenin	MAPK14
S24-m	Jujubogenin	PIM1
